# Supplementary material
Source: PubMed Central journal article supplement (PMC4366636)
Supplement: ijbsv11p0370s1.pdf [file ijbsv11p0370s1.pdf]

## Supplementary Materials and Methods

**Antibodies.** Anti- $\alpha$ -SMA (1A4) and anti-SDF-1 (79018) monoclonal antibodies for immunocytochemistry were purchased from R&D Systems Inc., Minneapolis, MN, USA. Anti-Pan-Keratin (C11) and anti-vimentin (R28) monoclonal antibodies were obtained from Cell Signaling Technology, Inc., Beverly, Massachusetts, USA. Anti-FAP $\alpha$  anti-collagen I (5D8), were obtained from Abcam Inc., Cambridge, MA, USA. Human cytokine antibody array kits were obtained from RayBiotech, Norcross, GA, USA. Rabbit anti-human Cav-1 (N-20) polyclonal antibody for Western blot and immunohistochemistry, as well as anti- $\beta$ -actin (N-21) for Western blot, were obtained from Santa Cruz Biotechnology Inc., Santa Cruz, CA, USA. Phycoerythrin (PE)-conjugated secondary antibody for flow cytometry and the Alexa Fluor secondary antibody used for immunocytochemistry were purchased from Invitrogen Corp., Carlsbad, Calif., USA.

**Indirect immunocytochemistry of cultured cells.** Cells cultured on the glass cover slips were washed thrice with PBS, fixed in 4% (weight/vol) paraformaldehyde in PBS (PFA/PBS; Sigma-Aldrich, St. Louis, MO, USA) for 10 min at room temperature, and then washed again thrice in PBS after reaching confluence. The cells were permeabilized with 0.1% (vol/vol) Triton X-100/PBS (Amresco Inc., Cleveland, Ohio, USA) for 10 min at room temperature. Afterward, the cells were washed thrice in PBS and incubated with 3% (weight/vol) bovine serum albumin (BSA)/0.3 M glycine in PBS (Sigma-Aldrich) for 2 h at room temperature to reduce the nonspecific binding of primary antibodies. Subsequently, 200  $\mu$ l of the appropriate primary antibody, diluted in 3% (weight/vol) BSA/PBS, was placed on each cover slip, and then incubated overnight at 4°C. The cover slips were then washed thrice for 15 min each with PBS and were incubated with 200  $\mu$ l of the secondary antibody (Alexa Fluor 488) diluted 1:2000 with 3% (weight/vol) BSA/PBS for 2 h at room temperature. Afterward, the cover slips were washed thrice for

5 min each with PBS and counter-stained with DAPI (0.1 µg/ml in PBS; Roche) for 1 min to visualize the nuclei. A final series of three 5 min washes with PBS was performed, after which, the cover slips were mounted on 1.5 µl Bio-Rad FluoroGuard™ Anti-fade Reagent (Bio-Rad, Hercules, CA, USA). The cover slips were sealed with nail polish.

**Proliferation assay.** A total of 3,000 AGS and MKN45 cells per well were seeded in 96-well plates and cultured in RPMI 1640 with 10% FCS. Then the medium was changed to serum-free RPMI for overnight incubation. Concentrated CM of the fibroblasts was added to AGS and MKN45 cells at various concentrations (0.25, 0.5, and 1.0 µg/µL), and serum-free RPMI 1640 or 10% FCS was added to the control wells. The cells were grown in a humidified atmosphere of 5% CO<sub>2</sub> at 37°C. The cell growth of the AGS and MKN45 cell lines was each analyzed at 72 h with the CCK-8 reagent (Sigma-Aldrich) added 1 h before taking the spectrophotometric reading, according to the manufacturer's instructions

**Invasion assay.** BioCoat Matrigel-coated invasion chambers (BD Biosciences) were used to study cell invasiveness. Briefly, 1×10<sup>5</sup> AGS or MKN45 cells in 500 µL serum-free medium was added to the upper chamber. The medium containing RPMI 1640, 10% FCS, or concentrated CM of the fibroblasts (0.25, 0.5, and 1.0 µg/µL) was added into the lower chamber. Serum-free medium was added to the lower chamber of the control wells. The cells were allowed to traverse the Matrigel for 72 h at 37°C in an environment with 5% CO<sub>2</sub>. The non-invading cells on the upper surface of the membrane were removed with a cotton swab, and the filters were fixed in 0.1% glutaraldehyde and stained with 0.2% crystal violet. The number of cells that migrated to the lower side of the filter was counted under an upright microscope (Nikon Optiphot) using Image-Pro Plus 4.5 software (Media Cybernetics, Silver Spring, MD, USA). The whole area was counted per filter.

Supplementary Table S1. Basic characteristics of 120 gastric cancer patients.

| Variables                 | Number (%) | 5-year survival rate (%) |
|---------------------------|------------|--------------------------|
| Age (y)                   |            |                          |
| <60                       | 49 (41)    | 50                       |
| ≥60                       | 71 (59)    | 43                       |
| Sex                       |            |                          |
| Male                      | 74 (68)    | 51                       |
| Female                    | 36 (32)    | 30                       |
| H pylori infection*       |            |                          |
| negative                  | 53 (58)    | 49                       |
| positive                  | 38 (42)    | 52                       |
| Size(cm)                  |            |                          |
| <5                        | 60 (50)    | 54                       |
| ≥5                        | 60 (50)    | 35                       |
| Histologic type           |            |                          |
| Well and moderately       | 74 (62)    | 57                       |
| Poorly and others*        | 46 (38)    | 25                       |
| Lauren classification     |            |                          |
| Intestinal type           | 73 (61)    | 53                       |
| Diffuse and Mixed type    | 47 (35)    | 32                       |
| Location                  |            |                          |
| GEJ                       | 14 (12)    | 48                       |
| Stomach                   | 96 (88)    | 23                       |
| Lymphatic invasion        |            |                          |
| negative                  | 31 (26)    | 58                       |
| positive                  | 79 (74)    | 39                       |
| Depth of tumor(T)         |            |                          |
| T1+ T2                    | 28 (23)    | 81                       |
| T3+ T4                    | 92 (77)    | 35                       |
| Lymph node metastasis (N) |            |                          |
| No+ N1                    | 52 (43)    | 57                       |
| N2+ N3                    | 68 (57)    | 35                       |
| Distant metastasis(M)     |            |                          |
| M0                        | 107 (89)   | 48                       |
| M1                        | 13 (11)    | 20                       |
| TNM stage                 |            |                          |
| I+II                      | 52 (43)    | 58                       |
| III+IV                    | 68 (57)    | 35                       |

Note : \**H. pylori* status was determined histologically and/or serologically. GEJ: gastroesophageal junction. The TNM stage of GC was determined according to the classification system of the International Union Against Cancer (7th edition). \*Other histologic types of gastric cancer mainly included mucinous adenocarcinomas and signet-ring cell carcinomas, according to the World Health Organization (WHO) classifications.

**Supplementary Table S2. Patient Characteristics of Primary Fibroblast Cultures**

| NO. | Sex    | Age (y) | Histological Type | Location | Lauren Classification | Tumor Stage |     |    | Adjacent Tissue |            |
|-----|--------|---------|-------------------|----------|-----------------------|-------------|-----|----|-----------------|------------|
|     |        |         |                   |          |                       | T           | N   | M  | Histology       | H.p Status |
| 1   | Male   | 79      | P                 | Antrum   | IGC                   | T4a         | N2  | M0 | CG with IM      | Neg        |
| 2   | Male   | 61      | P                 | Corpus   | IGC                   | T3          | N0  | M0 | CG              | Pos        |
| 3   | Male   | 52      | P                 | Antrum   | MGC                   | T3          | N3b | M0 | CG              | Neg        |
| 4   | Male   | 58      | M                 | Antrum   | DGC                   | T3          | N2  | M1 | CG              | Neg        |
| 5   | Male   | 54      | M                 | Antrum   | IGC                   | T3          | N3a | M0 | CG              | Pos        |
| 6   | Male   | 48      | P                 | Corpus   | IGC                   | T3          | N0  | M0 | CG              | ND         |
| 7   | Female | 67      | M                 | Corpus   | DGC                   | T3          | N3a | M1 | CG              | Neg        |
| 8   | Male   | 59      | M                 | Antrum   | MGC                   | T4          | N1  | M0 | CG              | Neg        |
| 9   | Male   | 84      | M                 | Antrum   | IGC                   | T4b         | N1  | M0 | CG with IM      | ND         |
| 10  | Female | 47      | M                 | GEJ      | DGC                   | T2          | N2  | M0 | CG              | Neg        |

Note: M-moderately differentiated; P-poorly differentiated; ; IGC- Intestinal gastric cancer; DGC-diffuse gastric cancer; MGC-mixed gastric cancer; T-tumor; N-lymph node; M- metastasis. IM-Intestinal metaplasia; CG-Chronic gastritis; Neg, negative; Pos, positive; ND, not determined;

Supplementary Table S3. Expression difference of soluble mediators in the Media of  
GCAFs and GIAFs

| Protein Name    | Ratio of GCAFs/GIAFs | Official Gene Name                                     |
|-----------------|----------------------|--------------------------------------------------------|
| Cytokines       |                      |                                                        |
| IL-1alpha       | 1.04                 | interleukin 1, alpha                                   |
| IL-2            | 1.24                 | interleukin 2                                          |
| IL-3            | 1.25                 | interleukin 3                                          |
| IL-4 *          | 1.60                 | interleukin 4                                          |
| IL-5            | 1.29                 | interleukin 5                                          |
| IL-6 **         | 2.07                 | interleukin 6                                          |
| IL-7 *          | 1.60                 | interleukin 7                                          |
| IL-8 **         | 3.57                 | interleukin 8                                          |
| IL-12P70        | 1.19                 | interleukin 12A                                        |
| IL-12P40 *      | 1.53                 | interleukin 12B                                        |
| IL-13           | 1.30                 | interleukin 13                                         |
| IL-15           | 1.23                 | interleukin 15                                         |
| IL-1ra          | 1.15                 | interleukin 1 receptor antagonist                      |
| IL-2sRa *       | 1.33                 | interleukin 2 receptor, alpha                          |
| GM-CSF          | 1.06                 | colony stimulating factor 2                            |
| G-CSF           | 1.03                 | colony stimulating factor 3                            |
| TNF-alpha       | 1.12                 | tumor necrosis factor, alpha                           |
| TNF-beta        | 1.35                 | tumor necrosis factor, beta                            |
| MIF *           | 1.41                 | macrophage migration inhibitory factor                 |
| TIMP-1          | 1.02                 | tissue inhibitor of metalloproteinase 1                |
| TIMP-2 *        | 1.69                 | tissue inhibitor of metalloproteinase 2                |
| IFN-gamma       | 1.37                 | interferon, gamma                                      |
| TPO             | 1.22                 | thrombopoietin                                         |
| Signal Proteins |                      |                                                        |
| BMP-4 *         | 1.53                 | bone morphogenetic protein 4                           |
| BMP-6 *         | 1.63                 | bone morphogenetic protein 6                           |
| Angiogenin **   | 1.53                 | angiogenin, ribonuclease, RNase A family, 5            |
| IGFBP-1         | 1.17                 | insulin-like growth factor binding protein 1           |
| IGFBP-3 *       | 1.39                 | insulin-like growth factor binding protein 3           |
| IGFBP-4 *       | 1.57                 | insulin-like growth factor binding protein 4           |
| IGFBP-6 *       | 1.66                 | insulin-like growth factor binding protein 6           |
| Leptin          | 1.05                 | Leptin                                                 |
| SCF             | 1.34                 | stem cell factor                                       |
| Fas             | 1.22                 | Fas (TNF receptor superfamily, member 6)               |
| Osteoprotegerin | 1.18                 | tumor necrosis factor receptor superfamily, member 11b |

|                     |      |                                                                                                     |
|---------------------|------|-----------------------------------------------------------------------------------------------------|
| Oncostatin M        | 1.11 | Oncostatin M                                                                                        |
| IL-6 sR             | 1.06 | interleukin 6 receptor                                                                              |
| TRAIL R4 *          |      | tumor necrosis factor receptor                                                                      |
|                     | 1.43 | superfamily, member 10d, decoy with truncated death domain                                          |
| EGFR                |      | epidermal growth factor receptor                                                                    |
|                     | 1.24 | (erythroblastic leukemia viral (v-erb-b) oncogene homolog, avian)                                   |
| IL-1R4              | 1.11 | interleukin-1 receptor 4                                                                            |
| GITR                | 1.14 | tumor necrosis factor receptor superfamily, member 18                                               |
| TNFR-1              | 1.26 | tumor necrosis factor receptor superfamily, member 1A                                               |
| Sgp130              | 1.12 | interleukin 6 signal transducer (gp130, oncostatin M receptor)                                      |
| IL-1 R-like 1       | 1.03 | interleukin 1 receptor-like 1                                                                       |
| Growth Factors      |      |                                                                                                     |
| TGF- $\beta$ 1 *#   | 2.04 | transforming growth factor, beta 1                                                                  |
| IGF-1 *#            | 2.24 | insulin-like growth factor 1                                                                        |
| HGF *#              | 2.07 | hepatocyte growth factor (hepapoietin A scatter factor)                                             |
| GDNF *              | 1.32 | glial cell derived neurotrophic factor                                                              |
| FGF-4               | 1.10 | fibroblast growth factor 4                                                                          |
| FGF-7               | 1.06 | fibroblast growth factor 7                                                                          |
| FGF-9               | 1.09 | fibroblast growth factor 9                                                                          |
| bFGF                | 1.06 | basic fibroblast growth factor                                                                      |
| Chemokines          |      |                                                                                                     |
| CCL1/I-309 *        | 1.88 | chemokine (C-C motif) ligand 1                                                                      |
| CCL2/MCP-1 *#       | 2.87 | chemokine (C-C motif) ligand 2/<br>macrophage chemotactic protein-1                                 |
| CCL3/MIP-1 $\alpha$ | 1.08 | chemokine (C-C motif) ligand 3/<br>macrophage inflammatory protein 1 $\alpha$                       |
| CCL4/MIP-1 $\beta$  | 1.01 | chemokine (C-C motif) ligand 4/<br>macrophage inflammatory protein 1 $\beta$                        |
| CCL5/RANTES *#      | 2.01 | chemokine (C-C motif) ligand 5/<br>regulated upon activation, normal T cells expressed and secreted |
| CCL11/Eotaxin       | 1.47 | chemokine (C-C motif) ligand 11                                                                     |
| CCL16/LEC*#         | 2.15 | chemokine (C-C motif) ligand 16/<br>liver-expressed chemokine                                       |
| CCL20/MIP-3         | 1.05 | chemokine (C-C motif) ligand 20/<br>macrophage inflammatory protein 3                               |
| CCL23/CKb8-1        | 1.35 | chemokine (C-C motif) ligand 23                                                                     |
| CCL24/Eotaxin-2     | 1.18 | chemokine (C-C motif) ligand 24                                                                     |
| CCL26/Eotaxin-3     | 1.01 | chemokine (C-C motif) ligand 26                                                                     |
| CCL-28*#            | 3.09 | chemokine (C-C motif) ligand 28                                                                     |

|                |             |                                                                                           |
|----------------|-------------|-------------------------------------------------------------------------------------------|
| CXCL9/MIG*#    | 3.10        | chemokine (C-X-C motif) ligand 9/<br>monokine induced by IFN                              |
| CXCL11/I-TAC   | 1.06        | chemokine (C-X-C motif) ligand<br>11/Interferon-inducible T-cell alpha<br>chemoattractant |
| CXCL12/SDF-1*# | 2.09        | chemokine (C-X-C motif) ligand<br>12/Stromal cell-derived factor-1                        |
| Lymphotactin   | 1.163341912 | lymphotactin                                                                              |

---

\*GCAFs/GIAFs ratio of more than 1.3 folds; # confirmation by ELISA.

Supplementary Table S4. Differentially Expressed Proteins in GCAFs and GIAFs by 2D-Nano-LC-ESI-MS/MS

| Accession<br>number                          | Symbol  | Description                                                      | Fold change      |                  |                  |
|----------------------------------------------|---------|------------------------------------------------------------------|------------------|------------------|------------------|
|                                              |         |                                                                  | (GCAF/GIAF)<br>1 | (GCAF/GIAF)<br>2 | (GCAF/GIAF)<br>3 |
| Seventy-six down-regulated proteins in GCAFs |         |                                                                  |                  |                  |                  |
| Q09666                                       | AHNAK   | Neuroblast differentiation-associated protein AHNAK              | 0.14             | 0.12             | 0.13             |
| O43852                                       | CALU    | Calumenin                                                        | 0.17             | 0.12             | 0.08             |
| P21266                                       | GSTM3   | Glutathione S-transferase Mu 3                                   | 0.14             | 0.13             | 0.18             |
| P07099                                       | EPHX1   | Epoxide hydrolase 1                                              | 0.1              | 0.19             | 0.21             |
| Q00688                                       | FKBP3   | FK506-binding protein 3                                          | 0.22             | 0.11             | 0.18             |
| P10599                                       | TXN     | Thioredoxin                                                      | 0.16             | 0.18             | 0.25             |
| Q03135                                       | CAV1    | Caveolin-1                                                       | 0.16             | 0.14             | 0.25             |
| O96008                                       | TOMM40  | Mitochondrial import receptor subunit TOM40 homolog              | 0.22             | 0.27             | 0.28             |
| P20700                                       | LMNB1   | Lamin-B1                                                         | 0.28             | 0.16             | 0.25             |
| P09429                                       | HMGB1   | High mobility group protein B1                                   | 0.15             | 0.24             | 0.29             |
| P62158                                       | CALM1   | Calmodulin                                                       | 0.11             | 0.29             | 0.19             |
| P13645                                       | KRT10   | Keratin, type I cytoskeletal 10                                  | 0.29             | 0.19             | 0.17             |
| Q99733                                       | NAP1L4  | Nucleosome assembly protein 1-like 4                             | 0.34             | 0.12             | 0.25             |
| Q8TDZ2                                       | MICAL1  | NEDD9-interacting protein with calponin homology and LIM domains | 0.35             | 0.23             | 0.36             |
| Q92597                                       | NDRG1   | Protein NDRG1                                                    | 0.37             | 0.29             | 0.26             |
| P28482                                       | MAPK1   | Mitogen-activated protein kinase 1                               | 0.37             | 0.13             | 0.33             |
| P47755                                       | CAPZA2  | F-actin-capping protein subunit alpha-2                          | 0.39             | 0.15             | 0.18             |
| P26038                                       | MSN     | Moesin                                                           | 0.39             | 0.31             | 0.39             |
| Q99715                                       | COL12A1 | Collagen alpha-1(XII) chain                                      | 0.42             | 0.2              | 0.07             |
| P19338                                       | NCL     | Nucleolin                                                        | 0.27             | 0.3              | 0.42             |
| P80303                                       | NUCB2   | Nucleobindin-2                                                   | 0.24             | 0.22             | 0.42             |
| P43121                                       | MCAM    | Cell surface glycoprotein MUC18                                  | 0.42             | 0.35             | 0.4              |



|        |         |                                                               |      |      |      |
|--------|---------|---------------------------------------------------------------|------|------|------|
| Q14914 | PTGR1   | Prostaglandin reductase 1                                     | 0.43 | 0.21 | 0.23 |
| P58546 | MTPN    | Myotrophin                                                    | 0.29 | 0.43 | 0.32 |
| P35527 | KRT9    | Keratin, type I cytoskeletal 9                                | 0.16 | 0.25 | 0.43 |
| O76074 | PDE5A   | cGMP-specific 3',5'-cyclic phosphodiesterase                  | 0.43 | 0.16 | 0.35 |
| Q9UNM6 | PSMD13  | 26S proteasome non-ATPase regulatory subunit 13               | 0.42 | 0.37 | 0.43 |
| P53992 | SEC24C  | Protein transport protein Sec24C                              | 0.45 | 0.22 | 0.42 |
| Q9P0K7 | RAI14   | Ankyrin                                                       | 0.45 | 0.25 | 0.19 |
| O60888 | CUTA    | Protein CutA                                                  | 0.42 | 0.46 | 0.42 |
| O95816 | BAG2    | BAG family molecular chaperone regulator 2                    | 0.35 | 0.1  | 0.48 |
|        | TXNDC1  |                                                               |      |      |      |
| Q9BRA2 | 7       | Thioredoxin domain-containing protein 17                      | 0.24 | 0.2  | 0.48 |
| P05387 | RPLP2   | 60S acidic ribosomal protein P2                               | 0.19 | 0.37 | 0.49 |
| P21964 | COMT    | Catechol O-methyltransferase                                  | 0.5  | 0.25 | 0.27 |
| Q14152 | EIF3A   | Eukaryotic translation initiation factor 3 subunit A          | 0.51 | 0.42 | 0.14 |
| P42224 | STAT1   | Signal transducer and activator of transcription 1-alpha/beta | 0.5  | 0.51 | 0.43 |
| P60228 | EIF3E   | Eukaryotic translation initiation factor 3 subunit E          | 0.44 | 0.32 | 0.52 |
| Q15181 | PPA1    | Inorganic pyrophosphatase                                     | 0.39 | 0.41 | 0.52 |
| O00116 | AGPS    | Alkyldihydroxyacetonephosphate synthase, peroxisomal          | 0.53 | 0.45 | 0.37 |
| P00441 | SOD1    | Superoxide dismutase [Cu-Zn]                                  | 0.24 | 0.34 | 0.53 |
| P00750 | PLAT    | Tissue-type plasminogen activator                             | 0.41 | 0.33 | 0.53 |
| Q7L2H7 | EIF3M   | Eukaryotic translation initiation factor 3 subunit M          | 0.54 | 0.42 | 0.44 |
| P61604 | HSPE1   | 10 kDa heat shock protein, mitochondrial                      | 0.49 | 0.54 | 0.44 |
| P15311 | EZR     | Ezrin                                                         | 0.31 | 0.54 | 0.35 |
| Q9UL46 | PSME2   | Proteasome activator complex subunit 2                        | 0.13 | 0.54 | 0.38 |
| Q01105 | SET     | Protein SET                                                   | 0.55 | 0.5  | 0.28 |
| P20290 | BTF3    | Transcription factor BTF3                                     | 0.21 | 0.55 | 0.54 |
| P61981 | YWHAG   | 14-3-3 protein gamma                                          | 0.55 | 0.43 | 0.42 |
|        | PRKCDB  |                                                               |      |      |      |
| Q969G5 | P       | Protein kinase C delta-binding protein                        | 0.4  | 0.49 | 0.55 |
| Q14444 | CAPRIN1 | Caprin-1                                                      | 0.4  | 0.56 | 0.2  |
| O43399 | TPD52L2 | Tumor protein D54                                             | 0.41 | 0.32 | 0.56 |

|                                           |          |                                                                 |      |      |      |
|-------------------------------------------|----------|-----------------------------------------------------------------|------|------|------|
| P63010                                    | AP2B1    | AP-2 complex subunit beta-1                                     | 0.57 | 0.4  | 0.47 |
| P25789                                    | PSMA4    | Proteasome subunit alpha type-4                                 | 0.26 | 0.57 | 0.39 |
| P62195                                    | PSMC5    | 26S protease regulatory subunit 8                               | 0.5  | 0.58 | 0.28 |
| Q9NQC3                                    | RTN4     | Reticulon-4                                                     | 0.48 | 0.58 | 0.37 |
| P05455                                    | SSB      | Lupus La protein                                                | 0.55 | 0.59 | 0.4  |
| O95336                                    | PGLS     | 6-phosphogluconolactonase                                       | 0.26 | 0.59 | 0.24 |
| Q9NVD7                                    | PARVA    | Alpha-parvin                                                    | 0.36 | 0.6  | 0.54 |
| P30085                                    | CMPK1    | UMP-CMP kinase                                                  | 0.39 | 0.6  | 0.53 |
| P05556                                    | ITGB1    | Integrin beta-1                                                 | 0.6  | 0.53 | 0.6  |
| P46459                                    | NSF      | Vesicle-fusing ATPase                                           | 0.52 | 0.61 | 0.17 |
| Q5T4S7                                    | UBR4     | E3 ubiquitin-protein ligase UBR4                                | 0.32 | 0.52 | 0.61 |
| P55209                                    | NAP1L1   | Nucleosome assembly protein 1-like 1                            | 0.61 | 0.37 | 0.41 |
| P27487                                    | DPP4     | Dipeptidyl peptidase 4                                          | 0.45 | 0.57 | 0.62 |
| Q562R1                                    | ACTBL2   | Beta-actin-like protein 2                                       | 0.08 | 0.63 | 0.49 |
| Q13561                                    | DCTN2    | Dynactin subunit 2                                              | 0.35 | 0.49 | 0.63 |
| P55769                                    | NHP2L1   | NHP2-like protein 1                                             | 0.63 | 0.23 | 0.61 |
| O95340                                    | PAPSS2   | Bifunctional 3'-phosphoadenosine 5'-phosphosulfate synthetase 2 | 0.63 | 0.56 | 0.39 |
| Q9HDC9                                    | APMAP    | Adipocyte plasma membrane-associated protein                    | 0.5  | 0.63 | 0.41 |
| P16070                                    | CD44     | CD44 antigen                                                    | 0.65 | 0.44 | 0.51 |
| P21589                                    | NT5E     | 5'-nucleotidase                                                 | 0.65 | 0.57 | 0.51 |
| P48163                                    | ME1      | NADP-dependent malic enzyme                                     | 0.31 | 0.43 | 0.66 |
|                                           | PPP1R12  |                                                                 |      |      |      |
| O14974                                    | A        | Protein phosphatase 1 regulatory subunit 12A                    | 0.66 | 0.54 | 0.24 |
| Q9H3H3                                    | C11orf68 | UPF0696 protein C11orf68                                        | 0.38 | 0.5  | 0.66 |
| Q96D15                                    | RCN3     | Reticulocalbin-3                                                | 0.65 | 0.52 | 0.66 |
| Q9BT78                                    | COPS4    | COP9 signalosome complex subunit 4                              | 0.66 | 0.56 | 0.29 |
| Forty-five up-regulated proteins in GCAFs |          |                                                                 |      |      |      |
| Q15084                                    | PDIA6    | Protein disulfide-isomerase A6                                  | 2.22 | 2.01 | 2.32 |
|                                           | SERPINE  |                                                                 |      |      |      |
| P07093                                    | 2        | Glia-derived nexin                                              | 2.78 | 2.35 | 2.46 |

|        |         |                                                             |      |      |      |
|--------|---------|-------------------------------------------------------------|------|------|------|
| P05067 | APP     | Amyloid beta A4 protein                                     | 2.16 | 2.79 | 2.42 |
| Q9HBL0 | TNS1    | Tensin-1                                                    | 2.29 | 2.82 | 2.74 |
| O95571 | ETHE1   | Protein ETHE1, mitochondrial                                | 2.1  | 2.39 | 2.93 |
| P09486 | SPARC   | SPARC                                                       | 2.94 | 1.62 | 1.77 |
| P07814 | EPRS    | Bifunctional aminoacyl-tRNA synthetase                      | 3.13 | 2.02 | 2.47 |
| Q9Y570 | PPME1   | Protein phosphatase methylesterase 1                        | 2.94 | 2.71 | 3.16 |
|        | GSPT2   | Eukaryotic peptide chain release factor GTP-binding subunit |      |      |      |
| Q8IYD1 |         | ERF3B                                                       | 2.58 | 2.05 | 3.2  |
| P61254 | RPL26   | 60S ribosomal protein L26                                   | 2.2  | 2.83 | 3.39 |
| P26373 | RPL13   | 60S ribosomal protein L13                                   | 3.42 | 2.4  | 2.43 |
| P40429 | RPL13A  | 60S ribosomal protein L13a                                  | 2.98 | 2.96 | 3.48 |
| P42677 | RPS27   | 40S ribosomal protein S27                                   | 3.55 | 2.2  | 2.23 |
| Q9Y5M8 | SRPRB   | Signal recognition particle receptor subunit beta           | 3.63 | 3.48 | 2.44 |
| P09619 | PDGFRB  | Beta-type platelet-derived growth factor receptor           | 2.15 | 2.33 | 3.71 |
| P56134 | ATP5J2  | ATP synthase subunit f, mitochondrial                       | 2.4  | 3.83 | 3.32 |
| Q16851 | UGP2    | UTP--glucose-1-phosphate uridylyltransferase                | 2.11 | 2.4  | 3.94 |
| P07996 | THBS1   | Thrombospondin-1                                            | 3.95 | 2.47 | 2.21 |
| P62988 | RPS27A  | Ubiquitin                                                   | 3.79 | 2.7  | 4.11 |
| P17301 | ITGA2   | Integrin alpha-2                                            | 2.39 | 4.52 | 3.04 |
| P68363 | TUBA1B  | Tubulin alpha-1B chain                                      | 2.88 | 2.15 | 4.59 |
| P54136 | RARS    | Arginyl-tRNA synthetase, cytoplasmic                        | 4.9  | 4.94 | 4.33 |
| P12111 | COL6A3  | Collagen alpha-3(VI) chain                                  | 4.95 | 4    | 3.33 |
| P02792 | FTL     | Ferritin light chain                                        | 3.09 | 2.29 | 5.53 |
| Q9BUT1 | BDH2    | 3-hydroxybutyrate dehydrogenase type 2                      | 4.27 | 5.62 | 5.51 |
| Q14254 | FLOT2   | Flotillin-2                                                 | 5.07 | 2.81 | 5.73 |
|        | SERPINE |                                                             |      |      |      |
| P05121 | 1       | Plasminogen activator inhibitor 1                           | 2.57 | 2.42 | 5.83 |
| Q9NZ01 | GPSN2   | Synaptic glycoprotein SC2                                   | 3    | 3    | 5.95 |
| Q9NQW7 | XPNPEP1 | Xaa-Pro aminopeptidase 1                                    | 5.76 | 6.58 | 5.59 |
| P46782 | RPS5    | 40S ribosomal protein S5                                    | 5.43 | 6.02 | 6.88 |
| P14174 | MIF     | Macrophage migration inhibitory factor                      | 7.19 | 2.31 | 2.75 |

|        |         |                                                       |       |       |       |
|--------|---------|-------------------------------------------------------|-------|-------|-------|
| Q08431 | MFGE8   | Lactadherin                                           | 7.54  | 3.3   | 4.75  |
| P01023 | A2M     | Alpha-2-macroglobulin                                 | 7.57  | 5.69  | 5.23  |
| Q9BWD1 | ACAT2   | Acetyl-CoA acetyltransferase, cytosolic               | 7.78  | 2.38  | 3.08  |
|        | KIAA119 |                                                       |       |       |       |
| Q8WUJ3 | 9       | Protein KIAA1199                                      | 4.49  | 8.08  | 2.06  |
| P62304 | SNRPE   | Small nuclear ribonucleoprotein E                     | 8.28  | 2.27  | 7.93  |
| P0C0L4 | C4B     | Complement C4-B                                       | 8.57  | 2.42  | 4.36  |
| Q9Y617 | PSAT1   | Phosphoserine aminotransferase                        | 4.54  | 3.09  | 9.81  |
| P50502 | ST13    | Hsc70-interacting protein                             | 2.54  | 9.95  | 8.39  |
| P61513 | RPL37A  | 60S ribosomal protein L37a                            | 2.11  | 7.63  | 10.38 |
| P22102 | GART    | Trifunctional purine biosynthetic protein adenosine-3 | 2.05  | 3.61  | 11.6  |
| Q9UMS6 | SYNPO2  | Synaptopodin-2                                        | 11.92 | 2.47  | 3.31  |
| P07585 | DCN     | Decorin                                               | 12.15 | 3.16  | 2.03  |
| Q9UKX3 | MYH13   | Myosin-13                                             | 13.36 | 4.96  | 8.5   |
| P00325 | ADH1B   | Alcohol dehydrogenase 1B                              | 9.63  | 57.67 | 71.88 |

---

Supplementary Table S5 Enrichment Analysis of GO terms and KEGG Pathways for Subnetwork Proteins

| Enriched function            | P-value  | Bayes factor | Genes                                                                                                              |
|------------------------------|----------|--------------|--------------------------------------------------------------------------------------------------------------------|
| Gene Ontology (GO)           |          |              |                                                                                                                    |
| Cell adhesion                | < 0.0001 | 10           | APP, CD4, CD44, COL14A1, COL4A6, FLOT2, HSPG2, ILK, ITGA2, ITGB1, LAMA1, LAMA3, PARVA, THBS1                       |
| Regulation of cell migration | 0.0001   | 6            | LAMA1, LAMA3, SERPINE2                                                                                             |
| Regulation of cell motility  | 0.0001   | 6            | LAMA1, LAMA3, SERPINE2                                                                                             |
| KEGG Pathway                 |          |              |                                                                                                                    |
| ECM-receptor interaction     | < 0.0001 | 16           | CD44, COL1A1, COL1A2, COL4A6, HSPG2, ITGA2, ITGB1, LAMA1, LAMA3, SDC2, THBS1                                       |
| Focal adhesion               | < 0.0001 | 15           | CAV1, COL1A1, COL1A2, COL4A6, ILK, ITGA2, ITGB1, LAMA1, LAMA3, MAPK1, PARVA, PDGFB, PDGFRB, PPP1R12A, ROCK2, THBS1 |

Supplementary Table S6. Correlations between Cav-1 Expression and Clinical Features of GC patients

| Parameters                | Cav-1 expression in GCAFs |    |             | Cav-1 expression in GIAFs |    |             |
|---------------------------|---------------------------|----|-------------|---------------------------|----|-------------|
|                           | +                         | -  | <i>P</i>    | +                         | -  | <i>P</i>    |
| Age (y)                   |                           |    | .825        |                           |    | .577        |
| <60                       | 24                        | 14 |             | 32                        | 6  |             |
| ≥60                       | 36                        | 18 |             | 43                        | 11 |             |
| Sex                       |                           |    | .161        |                           |    | .793        |
| Male                      | 37                        | 25 |             | 51                        | 11 |             |
| Female                    | 23                        | 7  |             | 24                        | 6  |             |
| H <i>pylori</i> infection |                           |    | .511        |                           |    | .057        |
| Negative                  | 30                        | 13 |             | 39                        | 4  |             |
| Positive                  | 30                        | 19 |             | 36                        | 13 |             |
| Location                  |                           |    | .742        |                           |    | <b>.041</b> |
| GEJ                       | 8                         | 3  |             | 6                         | 5  |             |
| Stomach                   | 52                        | 29 |             | 69                        | 12 |             |
| Size(cm)                  |                           |    | <b>.048</b> |                           |    | <b>.030</b> |
| <5                        | 35                        | 11 |             | 42                        | 4  |             |
| ≥5                        | 25                        | 21 |             | 33                        | 13 |             |
| Histologic type           |                           |    | <b>.007</b> |                           |    | .475        |
| Well and moderately       | 44                        | 14 |             | 46                        | 12 |             |
| Poorly and others*        | 16                        | 18 |             | 29                        | 5  |             |
| Lauren classification     |                           |    | .370        |                           |    | .848        |
| Intestinal                | 39                        | 17 |             | 46                        | 10 |             |
| Diffuse+Mixed             | 21                        | 15 |             | 29                        | 7  |             |
| Lymphatic invasion        |                           |    | <b>.000</b> |                           |    | <b>.002</b> |
| Negative                  | 52                        | 16 |             | 60                        | 7  |             |
| Positive                  | 8                         | 26 |             | 15                        | 10 |             |
| Depth of tumor (T)        |                           |    | <b>.008</b> |                           |    | .341        |
| T1+T2                     | 19                        | 2  |             | 19                        | 2  |             |
| T3+T4                     | 41                        | 30 |             | 56                        | 15 |             |
| Lymph node metastasis (N) |                           |    | <b>.015</b> |                           |    | <b>.006</b> |
| N0+N1                     | 32                        | 8  |             | 38                        | 2  |             |
| N2+N3                     | 28                        | 24 |             | 37                        | 15 |             |
| Distant metastasis (M)    |                           |    | .734        |                           |    | .386        |
| M0                        | 53                        | 29 |             | 68                        | 14 |             |
| M1                        | 7                         | 3  |             | 7                         | 3  |             |
| TNM stage                 |                           |    | <b>.002</b> |                           |    | <b>.007</b> |

---

|        |    |    |    |    |
|--------|----|----|----|----|
| I+II   | 36 | 8  | 41 | 3  |
| III+VI | 24 | 24 | 34 | 14 |

---

Note: \**H. pylori* status was determined histologically and/or serologically. GEJ: gastroesophageal junction. The TNM stage of GC was determined according to the classification system of the International Union Against Cancer (7th edition). \*Other histologic types of gastric cancer mainly included mucinous adenocarcinomas and signet-ring cell carcinomas, according to the World Health Organization (WHO) classifications.
